# Supplementary material for: Antagonistic interaction between jasmonic acid and cytokinin in xylem development
Source: PubMed Central journal article supplement (PMC5579306; doi:10.1038/s41598-017-10634-1), 2017-08-31
Supplement: 41598_2017_10634_MOESM1_ESM.pdf [file 41598_2017_10634_MOESM1_ESM.pdf]

## **Supplementary Information**

### **Antagonistic interaction between jasmonic acid and cytokinin in xylem development**

Geupil Jang<sup>1</sup>, Sun Hyun Chang<sup>1</sup>, Tae Young Um<sup>1</sup>, Sangyool Lee<sup>1</sup>, Ju-Kon Kim<sup>2</sup> and Yang Do Choi<sup>1,\*</sup>

<sup>1</sup>Department of Agricultural Biotechnology and Research Institute of Agriculture and Life Sciences, Seoul National University, Seoul 151-921, Korea

<sup>2</sup>Graduate School of International Agricultural Technology and Crop Biotechnology Institute/Green BioScience and Technology, Seoul National University, Pyeongchang 232-916, Korea

#### **Author for Correspondence:**

Yang Do Choi

Department of Agricultural Biotechnology and Research Institute of Agriculture and Life Sciences, Seoul National University, Seoul 151-921, Korea

Email: choiyngd@snu.ac.kr

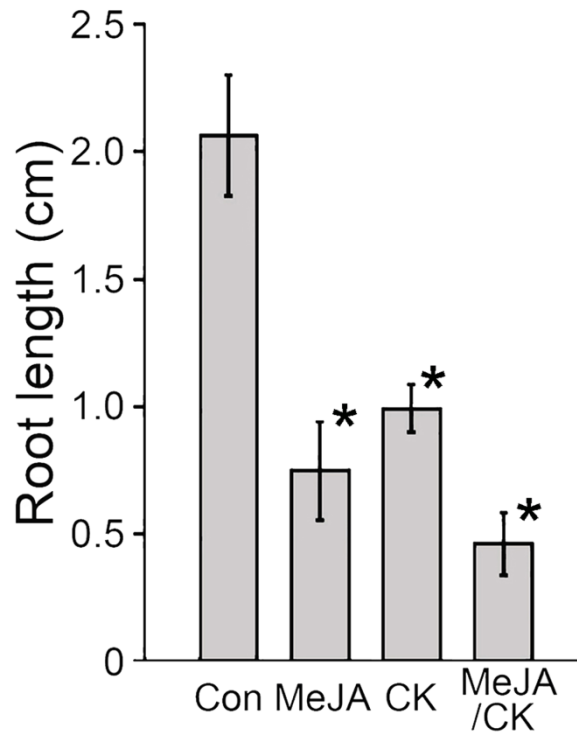

**Figure S1. Inhibition of apical root growth by JA and cytokinin.**

Root growth of Col-0 grown in the indicated conditions for 7 days (MeJA; 10  $\mu$ M, cytokinin; 50 nM BAP, MeJA/cytokinin; 10  $\mu$ M MeJA and 50 nM BAP) ( $n > 20$ ). Error bars represent S.D and asterisks indicate statistically significant differences between the corresponding samples and their control ( $p < 0.01$ ,  $t$ -test).

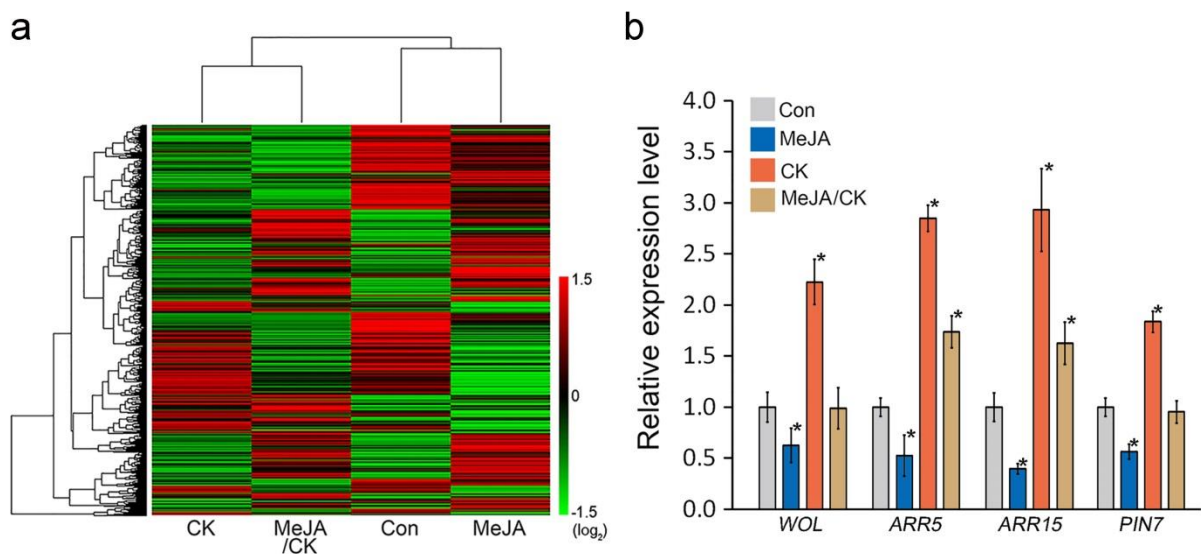

**Figure S2. Antagonistic interaction between JA and cytokinin.**

(a) Heat map showing distinct gene expression profiles between the indicated datasets. (b) Quantitative RT-PCR analysis of expression of *WOL*, *ARRs*, and *PIN7* in the Col-0 roots grown in the indicated conditions for 7 days (MeJA; 10  $\mu$ M, cytokinin; 50 nM BAP, MeJA/cytokinin; 10  $\mu$ M MeJA and 50 nM BAP). *GAPDH* was used as a reference gene. Error bars represent S.D and asterisks indicate statistically significant differences between the corresponding samples and their control ( $p < 0.01$ , *t*-test).

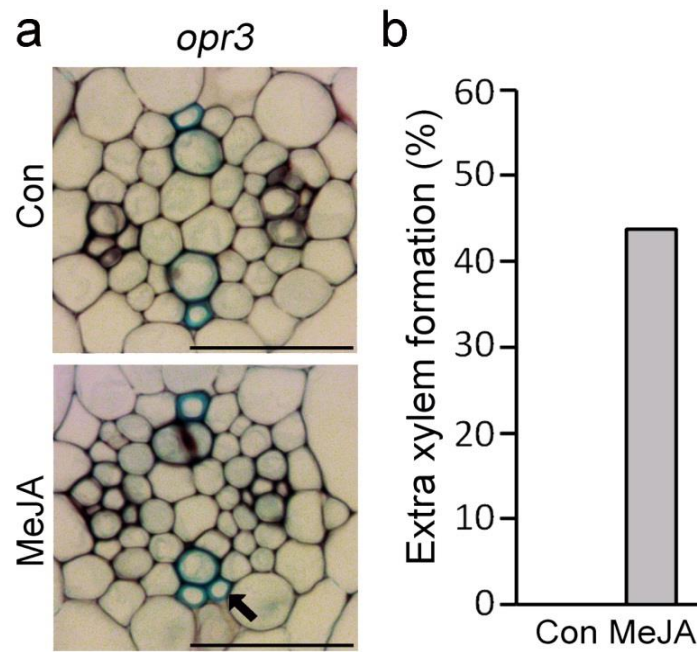

**Figure S3. Formation of extra xylem in the *opr3* mutant.**

(a) Root vasculature of *opr3* mutant plants grown in 10  $\mu$ M MeJA or not treated for 7 days. (b) Quantification of extra xylem formation in these plants ( $n > 15$ ). Percentages were calculated by dividing the number of plants with extra xylem by the number of plants observed. Arrow indicates extra xylem. Scale bar = 20  $\mu$ m.

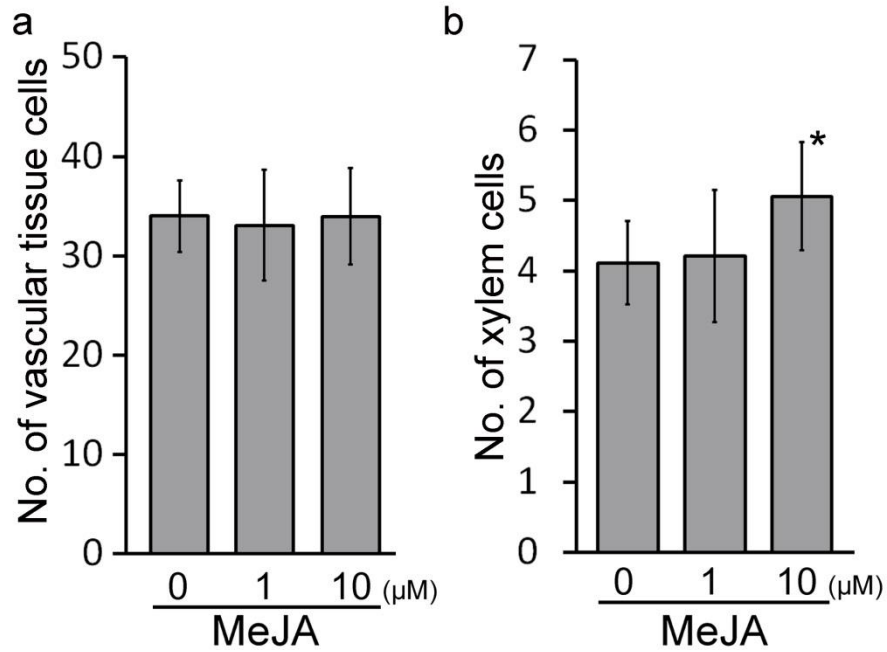

**Figure S4. JA promotes xylem differentiation.**

Quantification of the number of vascular tissue cells (a) and xylem cells (b) in the Col-0 roots grown in 1, 10 μM MeJA or not treated for 7 days ( $n > 30$ ). Error bars represent S.D and asterisks indicate statistically significant differences between the corresponding samples and their control ( $p < 0.01$ ,  $t$ -test).

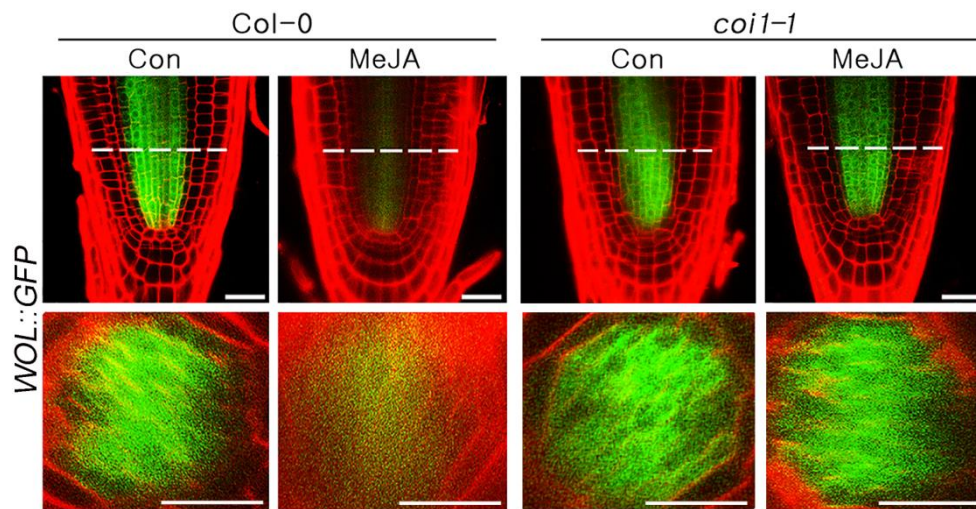

**Figure S5. JA reduces cytokinin response.**

Confocal longitudinal (top) and cross (bottom) sectioning images showing that MeJA reduced cytokinin-responsive *WOL* expression in the root of Col-0, but not in *coi1-1* mutants. Dotted lines indicate the longitudinal position where confocal optical cross-sectioning was performed. Scale bar = 20  $\mu$ m.

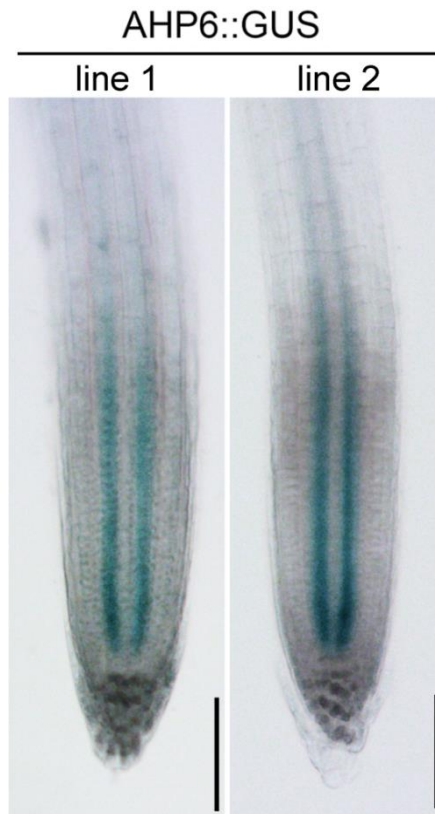

**Figure S6. GUS staining analysis of *AHP6::GUS* plants.**  
GUS staining of two independent lines of *AHP6::GUS* plants grown in MS media for 7 days. Scale bars = 100  $\mu$ m.

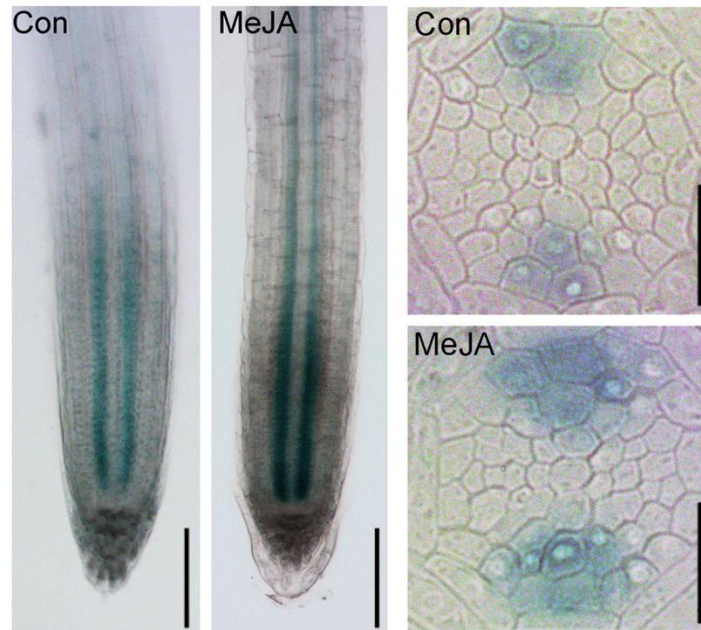

**Figure S7. JA increases expression of *AHP6*.**

Analysis of *AHP6* expression patterns in *Arabidopsis* roots grown in 10  $\mu$ M MeJA-untreated and -treated conditions using GUS staining. GUS staining solution with 1 mM ferrocyanide/ferricyanide was used. Whole mounted (left), and cross-sectioning images (right). Scale bar = 100  $\mu$ m in whole mounted images and 20  $\mu$ m in others.



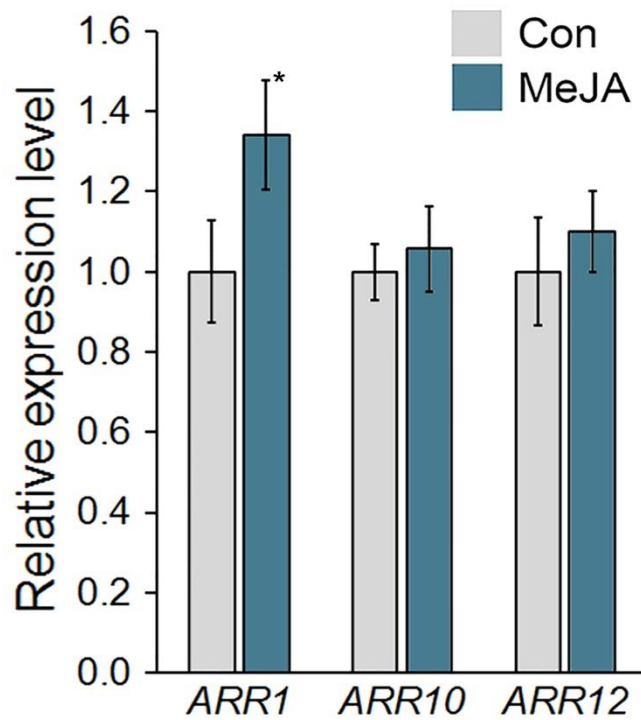

**Figure S8. Expressions of Type-B ARR in JA-treated Col-0 plants.**

Quantitative RT-PCR analysis of expression of Type-B ARR in the Col-0 roots grown in 10  $\mu$ M MeJA-untreated and -treated conditions for 7 days. *GAPDH* was used as a reference gene. Error bars represent S.D and asterisks indicate statistically significant differences between the corresponding samples and their control ( $p < 0.01$ , *t*-test).

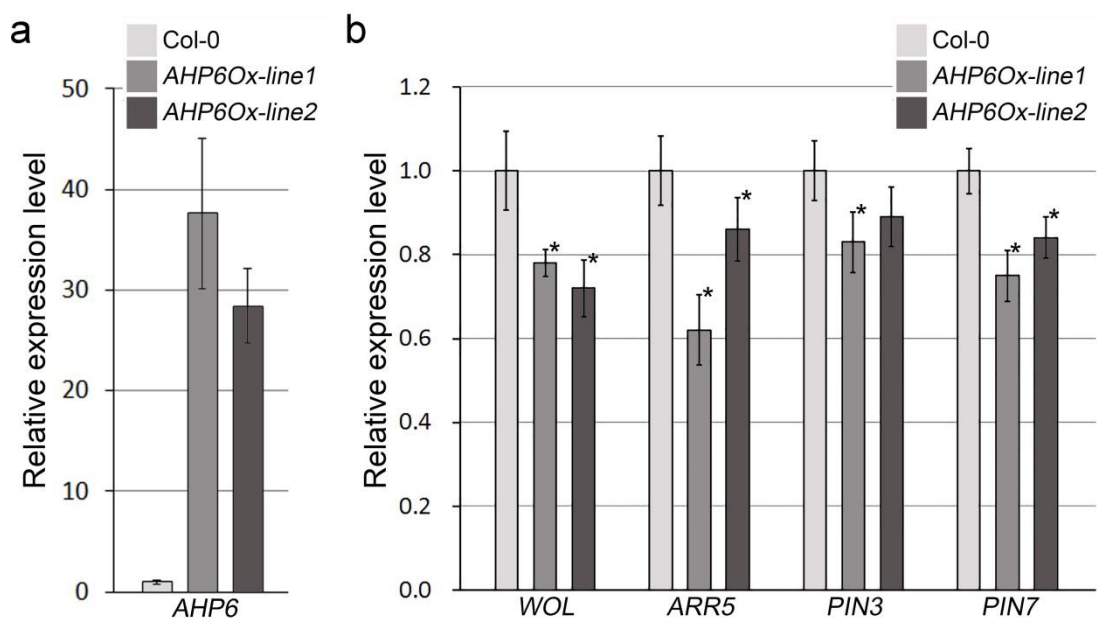

**Figure S9. Reduced cytokinin response in 35S::AHP6 plants.**

Expression levels of *AHP6* (a) and cytokinin-induced genes (b) in the roots of *AHP6*-overexpressing transgenic plants grown in MS media for 7 days. Line 1 and 2 indicate individual lines of *AHP6*-overexpressing transgenic plants. *GAPDH* was used as a reference gene. Error bars represent S.D and asterisks indicate statistically significant differences between the corresponding samples and their control ( $p < 0.01$ ,  $t$ -test).

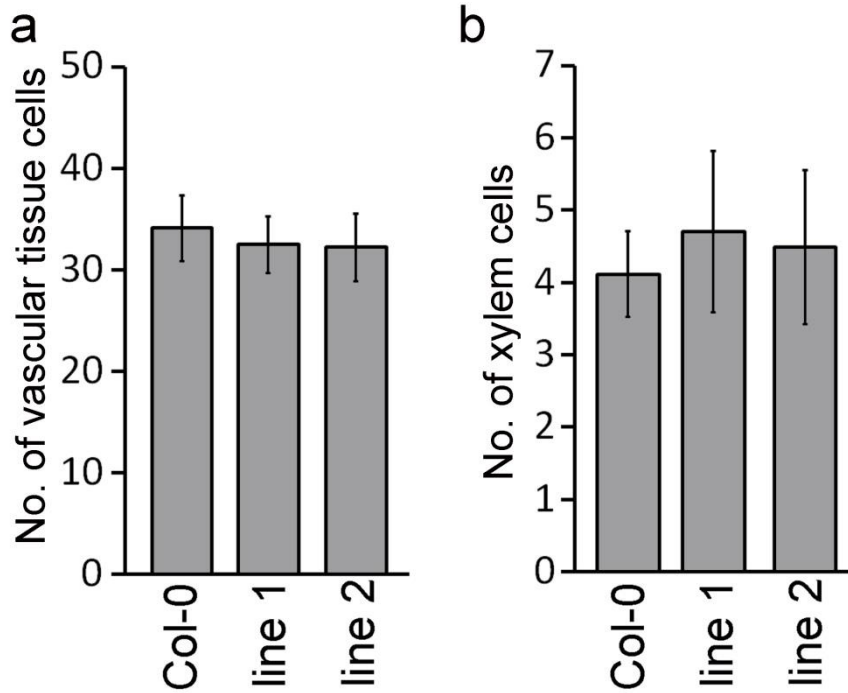

**Figure S10. Overexpression *AHP6* tends to increase the number of xylem cells.**

Quantification of the number of vascular tissue cells (a) and xylem cells (b) in the roots of *35S::AHP6* plants roots grown in JA-untreated conditions for 7 days ( $n>30$ ). Error bars represent S.D.

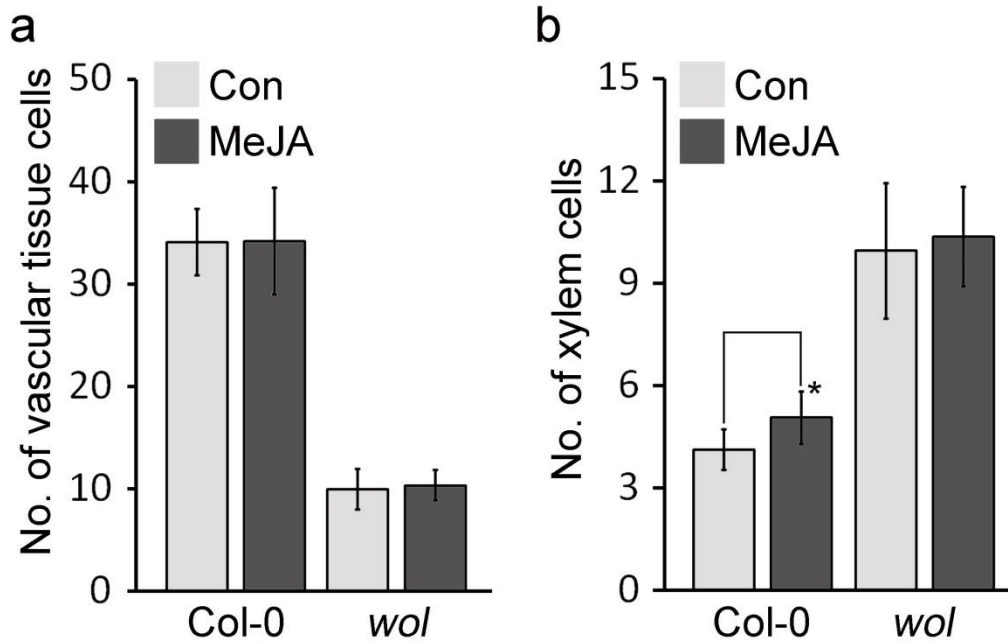

**Figure S11. JA does not affect xylem development in *wol* mutant plants.**

Quantification of the number of vascular tissue cells (a) and xylem cells (b) in the roots of *wol* mutant plants grown in 10  $\mu$ M MeJA or not treated for 7 days ( $n > 13$ ). Error bars represent S.D and asterisks indicate statistically significant differences between the corresponding samples and their control ( $p < 0.01$ ,  $t$ -test).

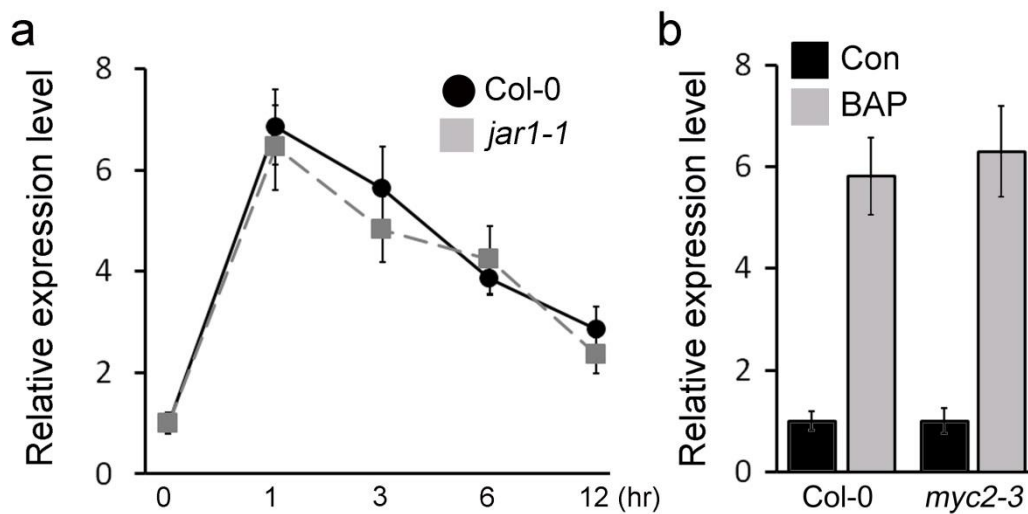

**Figure S12. Cytokinin responses in JA-signaling defective mutants.**

(a) *ARR5* expression was analyzed in *jar1-1* plants by qRT-PCR. Seven-day-old *jar1-1* and Col-0 seedlings were transferred to MS media containing 2  $\mu$ M BAP and incubated for the indicated time. Total RNA was extracted from these roots. (b) Expression levels of *ARR5* in the roots of *myc2-3* mutants treated or untreated with 2  $\mu$ M BAP for 3 hrs. *GAPDH* was used as a reference gene. Error bars represent S.D.

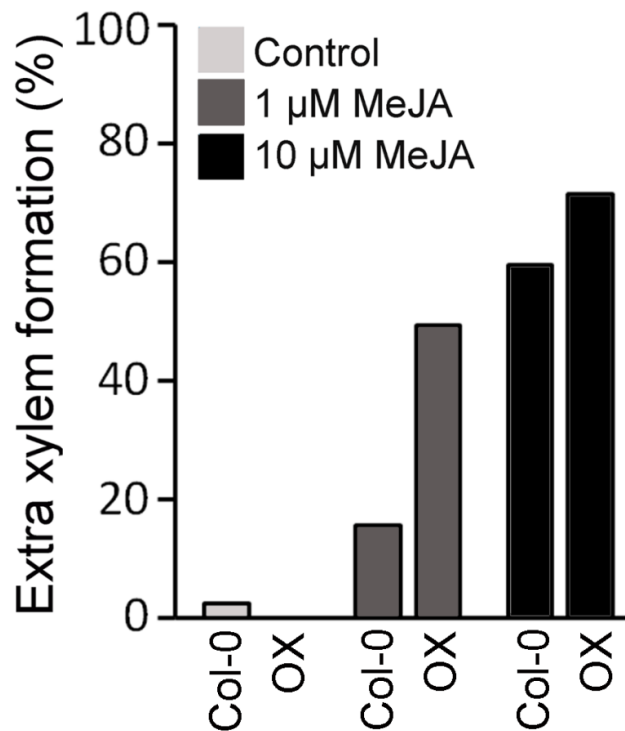

**Figure S13. MYC2 promotes formation of extra xylem in response to JA.**

Quantification of extra xylem formation in the roots of Col-0 and *35S::MYC2-GFP* (OX) grown in 1 and 10 μM MeJA-treated and -untreated conditions for 7 days ( $n > 20$ ). Percentages were calculated by dividing the number of plants with extra xylem by the number of plants observed.

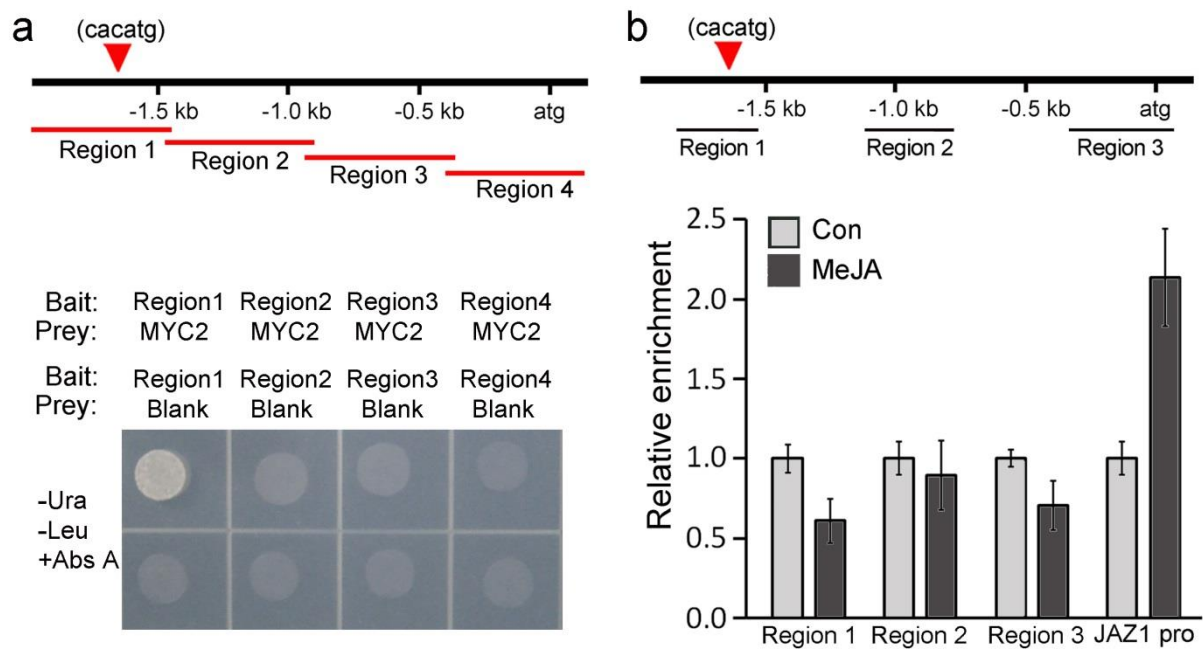

**Figure S14. MYC2 does not bind to the *AHP6* promoter.**

(a) Schematic of the *AHP6* promoter containing a putative MYC2-binding site (CACATG), and yeast one-hybrid results. Regions 1, 2, 3, and 4 indicate DNA fragments of the *AHP6* promoter inserted into the pAbAi bait plasmid. A full-length *MYC2* cDNA was inserted into the pGADT7 prey plasmid. -Ura -Leu + Abs A (150  $\mu$ M aureobasidin A) media were used to test the interaction between the the *AHP6* promoter and MYC2. (b) Chromatin immunoprecipitation (ChIP) assay using plants expressing *35S::MYC2-GFP* and GFP antibody. Plants were treated with MeJA for 4 hrs by transferring 7-day-old *35S::MYC2-GFP* seedlings into MS media containing 100  $\mu$ M MeJA. Enrichment of the indicated regions was analyzed by qPCR. *18S rRNA* was used as a reference gene. Error bars represent S.D.

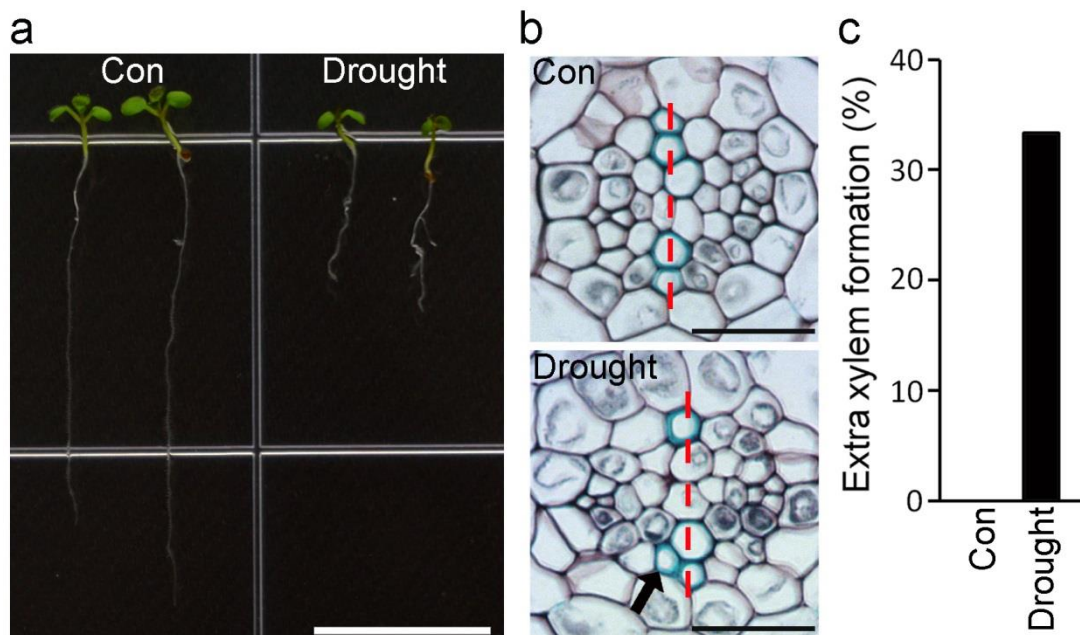

**Figure S15. Drought induces extra xylem cells.**

Root growth (a) vascular morphology (b) of Col-0 plants grown PEG-infused MS media. Four-day-old seedlings germinated on MS media were transferred to the control media (1/2 MS medium (Water potential = -0.25 MPa) and PEG-containing media (Water potential = -0.70 MPa), respectively. After 8 days, roots were collected from these plants and sectioned transversely. The red dotted line indicates a xylem axis. Arrow indicates an extra xylem (c) Quantification of extra xylem formation in these plants ( $n > 15$ ). Percentages were calculated by dividing the number of plants with extra xylem by the number of plants observed. Scale bar = 1 cm in (a) and 20  $\mu\text{m}$  in (b).



**Table S1. Putative MYC2-binding sites in the *AHP6* promoter.**

| <b>Locus Name</b> | <b>Position</b> | <b>Strand</b> | <b>Sequence</b> | <b>Silmilar Score</b> |
|-------------------|-----------------|---------------|-----------------|-----------------------|
| AT1G32640         | -1623           | +             | CACATg          | 1                     |
| AT1G32640         | -1482           | +             | ATACGaatt       | 0.75                  |
| AT1G32640         | -1482           | -             | ataCGAAT        | 0.75                  |
| AT1G32640         | -1342           | -             | aaaAGTAT        | 0.75                  |
| AT1G32640         | -1336           | +             | ATATGttt        | 0.75                  |
| AT1G32640         | -1079           | +             | ATACGtgc        | 0.88                  |
| AT1G32640         | -987            | -             | tcaCGTAA        | 0.75                  |
| AT1G32640         | -963            | +             | ATACAtt         | 0.75                  |
| AT1G32640         | -669            | +             | ATACGagg        | 0.75                  |
| AT1G32640         | -384            | -             | agaTGTAT        | 0.75                  |
| AT1G32640         | -215            | +             | ATACTtgt        | 0.88                  |
| AT1G32640         | -53             | +             | ATACCtct        | 0.75                  |

**Table S2. Primers used in this study.**

| Name           | Sequence                |
|----------------|-------------------------|
| ARR1 RT 5 for  | CACATCAGGACTCAGAATCC    |
| ARR1 RT 3 rev  | CGTCTGCATAAACCTGATG     |
| ARR10 RT 5 for | GGGATTGGATGGTTTAGCTC    |
| ARR10 RT 3 rev | CAGAGAAGAGAGAAGAGACAG   |
| ARR12 RT 5 for | GGAGGAGATTGGGATATGG     |
| ARR12 RT 3 rev | CTAAATTGCTAGAACCAGTGGG  |
| ARR5 RT 5 for  | GCACAAGAGAGAGCTTGAAGC   |
| ARR5 RT 3 rev  | TCAGGACATGCATGTGTGTG    |
| ARR6 RT 5 for  | GTTCACTCGCAGCTCAAAC     |
| ARR6 RT 3 rev  | GGCGAGAATCATCAGTGTAG    |
| ARR7 RT 5 for  | CCTCTTCTTGAACCAATCTG    |
| ARR7 RT 3 rev  | CATCGACGGCAAGAACATG     |
| ARR15 RT 5 for | GAGAGGTGGTGAAGCTGAAG    |
| ARR15 RT 3 rev | GTCGTCATCAAGGGAGGAAAC   |
| WOL RT 5 for   | GCCGAGAAAGATCGATTTTTGG  |
| WOL RT 3 rev   | GCTTTTGGTAACAATGCTCGATG |
| PIN3 RT 5 for  | GCCCTTTGTGTTTGCGAAG     |
| PIN3 RT 3 rev  | CAATTGACTCTTTCTCGGGG    |
| PIN7 RT 5 for  | CATCCCGCAATCTTGAGTAC    |
| PIN7 RT 3 rev  | CCTCTTCAGCCAAGCAGAAC    |
| AHP6 RT 5 for  | GTGCTTGAGAGGACTGGAGG    |
| AHP6 RT 3 rev  | TACATTGGATATCTGACTCCTG  |
| LOX2 RT 5 for  | GAGCCTGTTATCAATGCTGCA   |
| LOX2 RT 3 rev  | ATTCCGGTAACACCATGCTCA   |
| JR2 RT 5 for   | CAGTCAGAAGAACTGGTTGAG   |
| JR2 RT 3 rev   | AGGCAAATAACCATATTGACCC  |
| ACT2 RT 5 for  | CTTGCACCAAGCAGCATGAA    |
| ACT2 RT 3 rev  | CCGATCCAGACACTGTACTTCC  |
| GAPDH RT 5 for | GCATTGAGCGACAAGTTTGTG   |
| GAPDH RT 3 rev | AGTACGAACTCAACCACACAC   |
| ChIP R1 5 for  | GTCAAAGCAAAGGAATGACGAA  |
| ChIP R1 3 rev  | TGTCTCATTCGTATGTCATGC   |
| ChIP R2 5 for  | GCGATGTGATACCAATATACCA  |
| ChIP R2 3 rev  | GGCCTTTCTCTTTCTCGATCTA  |
| ChIP R3 5 for  | GGGGGAAAAAGGTAACCTGAC   |
| ChIP R3 3 rev  | TCGGCTTGAAGCCGGTCCAC    |

|                 |                                                           |
|-----------------|-----------------------------------------------------------|
| ChIP JAZ1 5 for | TTCAAAGAAACGGAAAGC                                        |
| ChIP JAZ1 3 rev | CTACCTCCAATATAACAAAGC                                     |
| 18 rRNA 5 for   | TACCGTCCTAGTCTCAACCA                                      |
| 18 rRNA 3 rev   | AACATCTAAGGGCATCACAG                                      |
| Bait R1 5 for   | ATAAAGCTTATCTCAATGACTCAT                                  |
| Bait R1 3 rev   | ATAGTCGACGGAACAAACAACACTAG                                |
| Bait R2 5 for   | ATAAAGCTTTACTACTTACTCTGA                                  |
| Bait R2 3 rev   | ATAGTCGACCGAATAAAGTAAAAA                                  |
| Bait R3 5 for   | ATAAAGCTTATAGTTAAGAGGACT                                  |
| Bait R3 3 rev   | ATAGTCGACTTCTTTTATCAGGTC                                  |
| Bait R4 5 for   | ATAAAGCTTTGTTATATGATTATA                                  |
| Bait R4 3 rev   | ATAGTCGACCCACAACGGCACACC                                  |
| Prey MYC2 5 for | ATACATATGATGACTGATTACCGG                                  |
| Prey MYC2 3 rev | ATAATCGATTTAACCGATTTTTGA                                  |
| AHP6 cDNA 5 for | GGGGACAAGTTTGTACAAAAAAGCAGGCTCCATGTTGGGGTTGGGTGTG<br>GA   |
| AHP6 cDNA 3 rev | GGGGACCACTTTGTACAAGAAAGCTGGGTCTTACATTGGATATCTGACTC<br>CTG |
| AHP6 pro 5 for  | TACGCCAAGCTTGGCTGCAGATCTCAATGACTCATCATATC                 |
| AHP6 pro 3 rev  | AAAACGACGGCCAGTGAATTCACACAACGGCACACCCGT                   |
